# Supplementary material for: Syntheses, photoluminescence and electroluminescence of four heteroleptic iridium complexes with 2-(5-phenyl-1,3,4-oxadiazol-2-yl)-phenol derivatives as ancillary ligands
Source: Royal Society of Chemistry journal article supplement (doi:10.1039/c3tc31915f), 2013-11-15
Supplement: c3tc31915f.pdf [file c3tc31915f.pdf]

## Supporting Information

### Syntheses, photoluminescence and electroluminescence of four heteroleptic iridium complexes with 2-(5-phenyl-1,3,4-oxadiazol-2-yl)-phenol derivatives as ancillary ligands

Hong-Yan Li,<sup>a,b</sup> Tian-Yi Li,<sup>a</sup> Ming-Yu Teng,<sup>c</sup> Qiu-Lei Xu,<sup>a</sup> Song Zhang,<sup>a</sup> Yi-Ming Jin,<sup>a</sup> Xuan Liu,<sup>a</sup> You-Xuan Zheng,<sup>a,\*</sup> Jing-Lin Zuo<sup>a</sup>

<sup>10</sup> *a: State Key Laboratory of Coordination Chemistry, Nanjing National Laboratory of Microstructures, Center for Molecular Organic Chemistry, School of Chemistry and Chemical Engineering, Nanjing University, Nanjing 210093, P. R. China, e-mail: yxzheng@nju.edu.cn.*

*b: Engineering Research Center of Seawater Utilization Technology (Ministry of Education), School of Marine Science and Engineering, Hebei University of Technology, Tianjin 300130, P. R. China*

<sup>15</sup>

**Table S1** Selected bond lengths (Å) and angles (°) for **Ir1** and **Ir3**.

**Fig. S1** TGA thermograms of **Ir1** - **Ir4**.

<sup>20</sup> **Fig. S2** Relative emission spectra of complexes **Ir1** - **Ir4** in degassed dichloromethane at 77 K.

**Fig. S3** Cyclic voltammograms of complexes **Ir1**-**Ir4** in the negative range.

**Fig. S1** The <sup>13</sup>C-NMR spectra of **Ir1** in acetone-*d*<sub>6</sub>.

<sup>25</sup>

**Fig. S2** The <sup>13</sup>C-NMR spectra of **Ir2** in acetone-*d*<sub>6</sub>.

**Fig. S3** The <sup>13</sup>C-NMR spectra of **Ir3** in acetone-*d*<sub>6</sub>.

<sup>30</sup>

**Fig. S4** The <sup>13</sup>C-NMR spectra of **Ir4** in acetone-*d*<sub>6</sub>.

<sup>35</sup>

5

10

**Table S1** Selected bond lengths (Å) and angles (°) for **Ir1** and **Ir3**.

| <b>Ir1</b>        |          |                  |          |                  |          |
|-------------------|----------|------------------|----------|------------------|----------|
| Ir(1)-C(39)       | 1.967(8) | Ir(1)-C(51)      | 1.977(7) | Ir(1)-N(5)       | 2.051(6) |
| Ir(1)-N(8)        | 2.054(6) | Ir(1)-N(6)       | 2.130(6) | Ir(1)-O(3)       | 2.150(5) |
| C(39)-Ir(1)-C(51) | 88.2(3)  | C(39)-Ir(1)-N(5) | 94.5(3)  | C(51)-Ir(1)-N(5) | 80.8(3)  |
| C(39)-Ir(1)-N(8)  | 80.5(3)  | C(51)-Ir(1)-N(8) | 94.9(2)  | N(5)-Ir(1)-N(8)  | 173.5(2) |
| C(39)-Ir(1)-N(6)  | 175.3(2) | C(51)-Ir(1)-N(6) | 96.2(2)  | N(5)-Ir(1)-N(6)  | 88.0(2)  |
| N(8)-Ir(1)-N(6)   | 97.3(2)  | C(39)-Ir(1)-O(3) | 92.2(2)  | C(51)-Ir(1)-O(3) | 174.5(2) |
| N(5)-Ir(1)-O(3)   | 93.8(2)  | N(8)-Ir(1)-O(3)  | 90.5(2)  | N(6)-Ir(1)-O(3)  | 83.7(2)  |

  

| <b>Ir3</b>       |           |                  |           |                  |           |
|------------------|-----------|------------------|-----------|------------------|-----------|
| C(1)-Ir(1)       | 1.990(12) | C(13)-Ir(1)      | 2.006(11) | Ir(1)-N(3)       | 2.042(10) |
| Ir(1)-N(4)       | 2.055(10) | Ir(1)-N(1)       | 2.097(9)  | Ir(1)-O(1)       | 2.145(8)  |
| C(1)-Ir(1)-C(13) | 90.4(5)   | C(1)-Ir(1)-N(3)  | 80.5(5)   | C(13)-Ir(1)-N(3) | 91.6(5)   |
| C(1)-Ir(1)-N(4)  | 95.9(5)   | C(13)-Ir(1)-N(4) | 81.0(5)   | N(3)-Ir(1)-N(4)  | 171.8(4)  |
| C(1)-Ir(1)-N(1)  | 92.2(4)   | C(13)-Ir(1)-N(1) | 176.5(5)  | N(3)-Ir(1)-N(1)  | 91.1(4)   |
| N(4)-Ir(1)-N(1)  | 96.4(4)   | C(1)-Ir(1)-O(1)  | 174.3(4)  | C(13)-Ir(1)-O(1) | 91.8(4)   |
| N(3)-Ir(1)-O(1)  | 94.2(4)   | N(4)-Ir(1)-O(1)  | 89.6(4)   | N(1)-Ir(1)-O(1)  | 85.8(4)   |

15

20

25

5

10

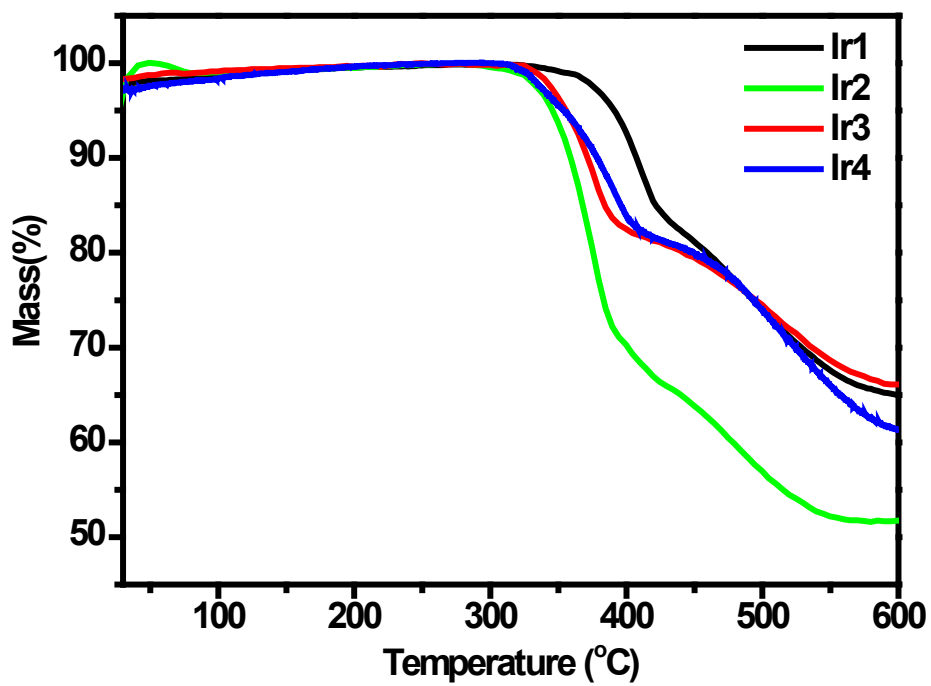

15

**Fig. S1** TGA thermograms of Ir1 - Ir4.

20

25

5

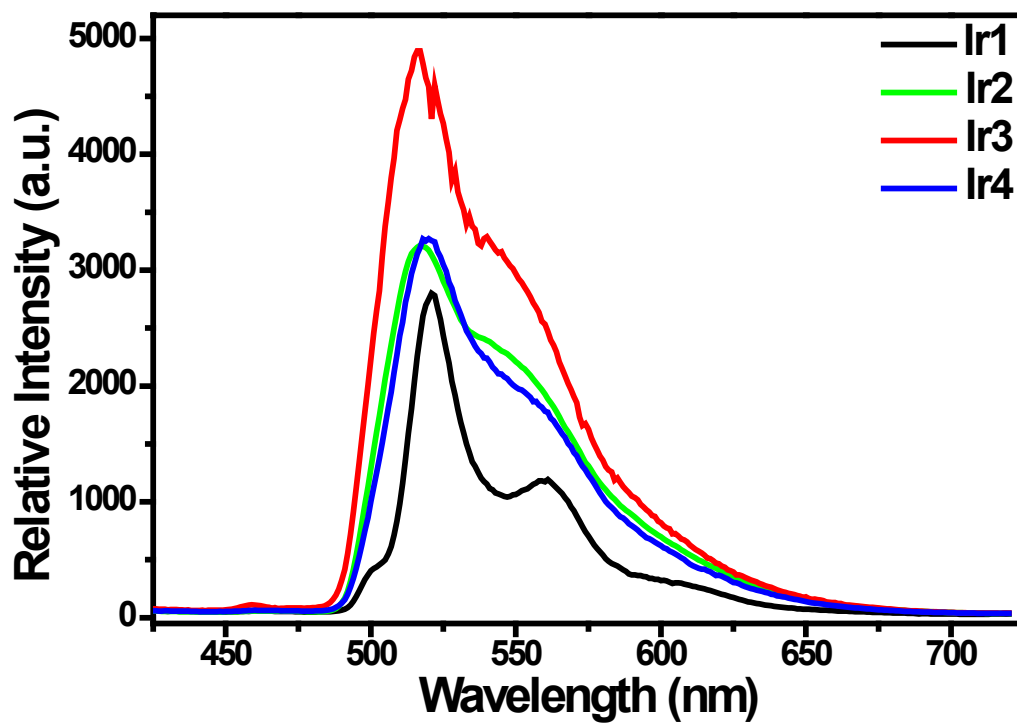

10 **Fig. S2** Relative emission spectra of complexes Ir1 - Ir4 in degassed dichloromethane at 77 K.

15

20

5

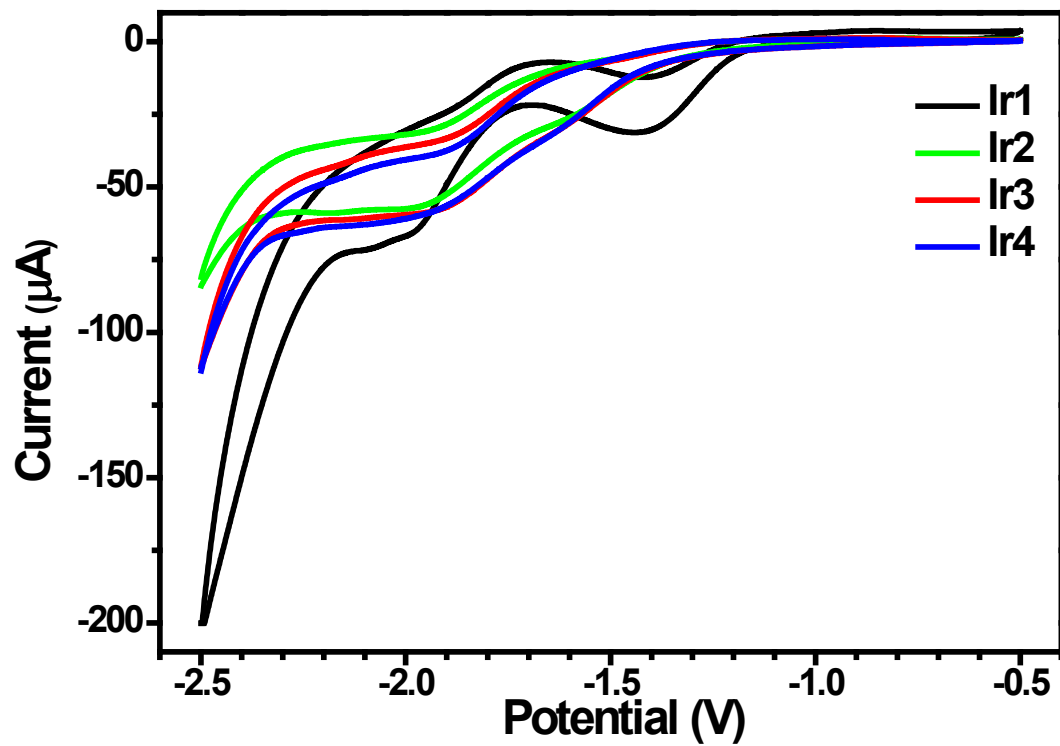

10 **Fig. S3** Cyclic voltammograms of complexes **Ir1-Ir4** in the negative range.

15

20

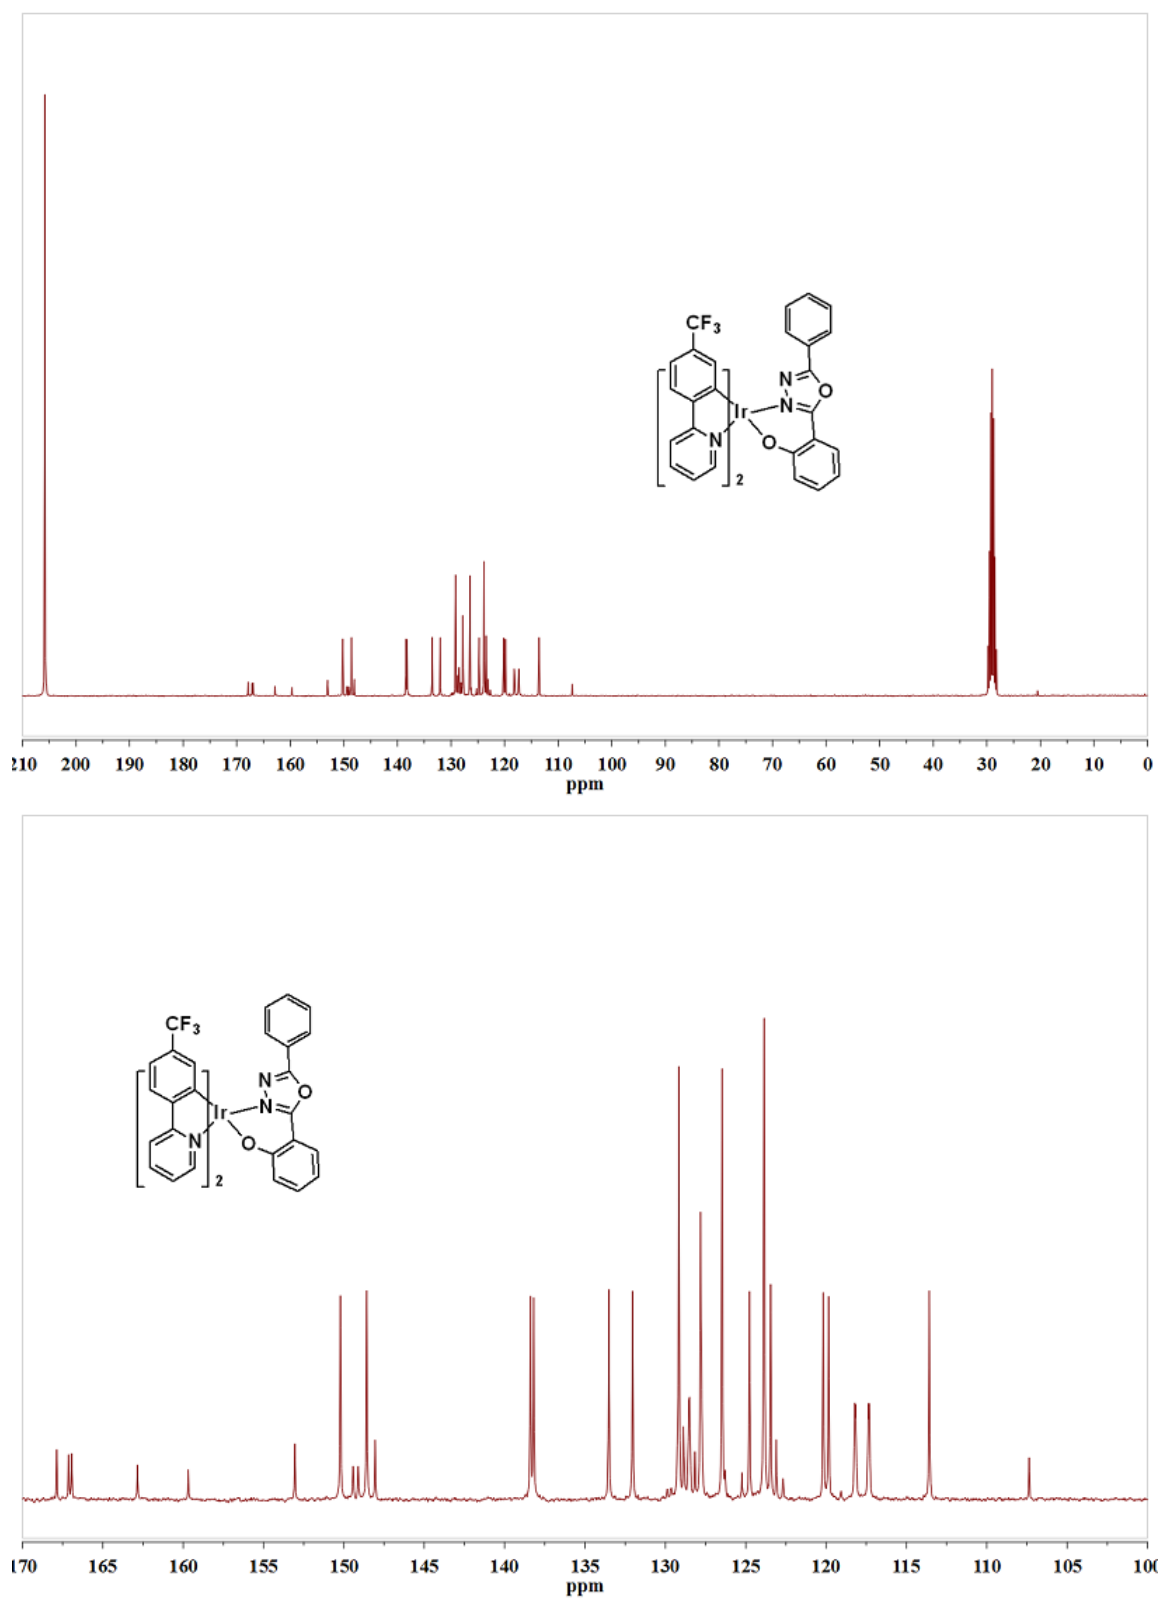

5

**Fig. S4** The  $^{13}\text{C}$ -NMR spectra of **Ir1** in  $\text{acetone-}d_6$ .

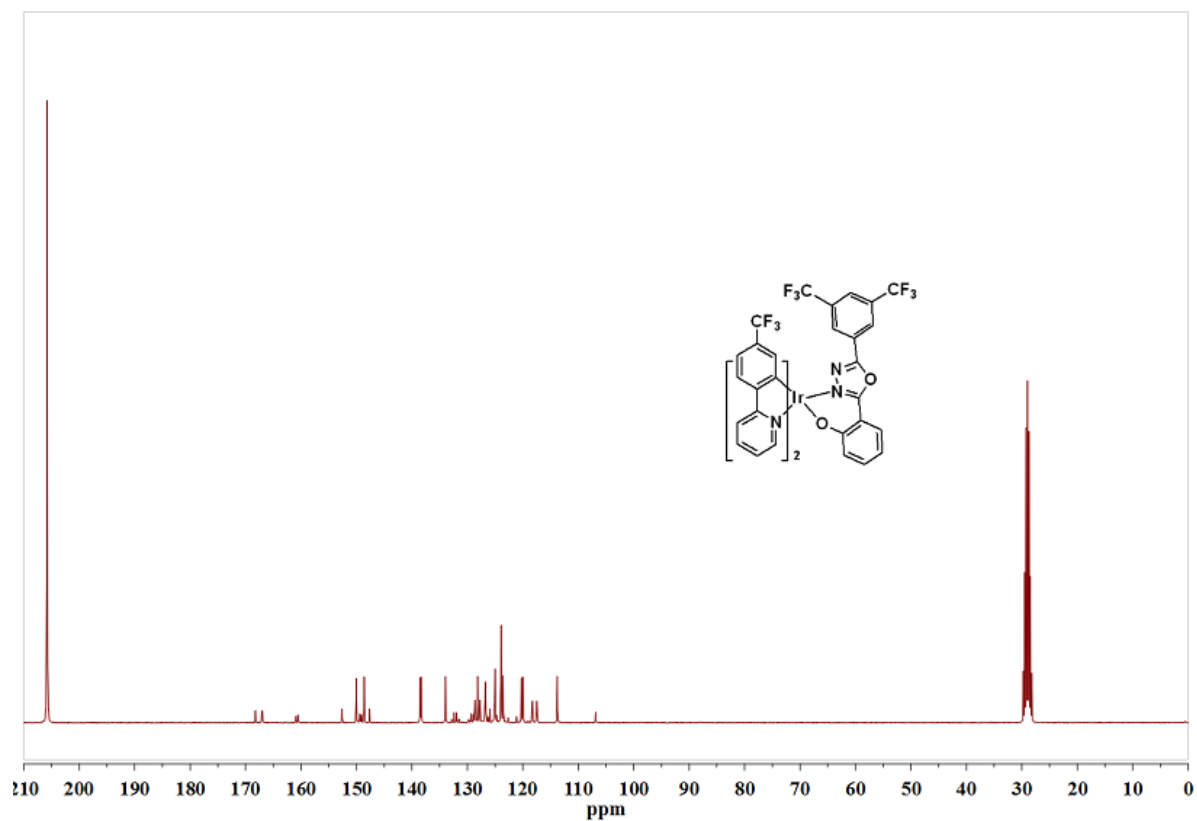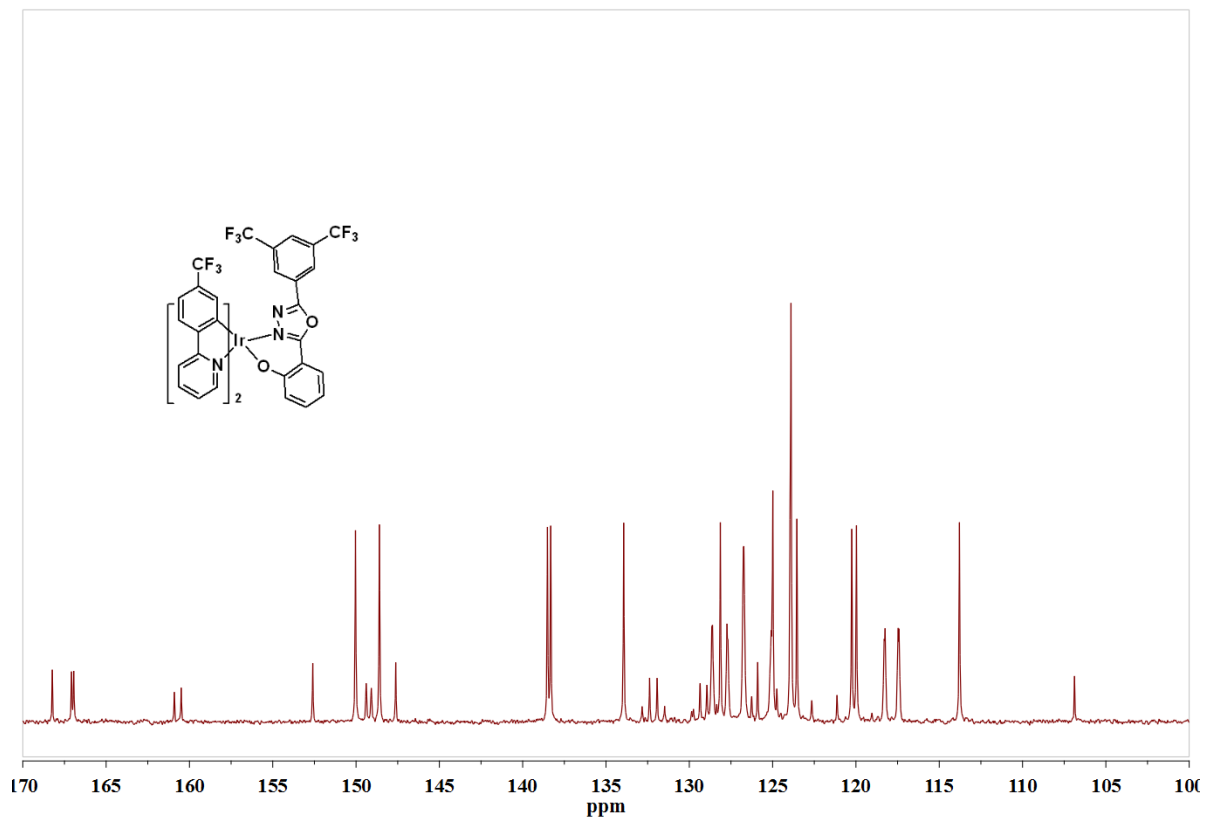

**Fig. S5** The  $^{13}\text{C}$ -NMR spectra of **Ir2** in acetone- $d_6$ .

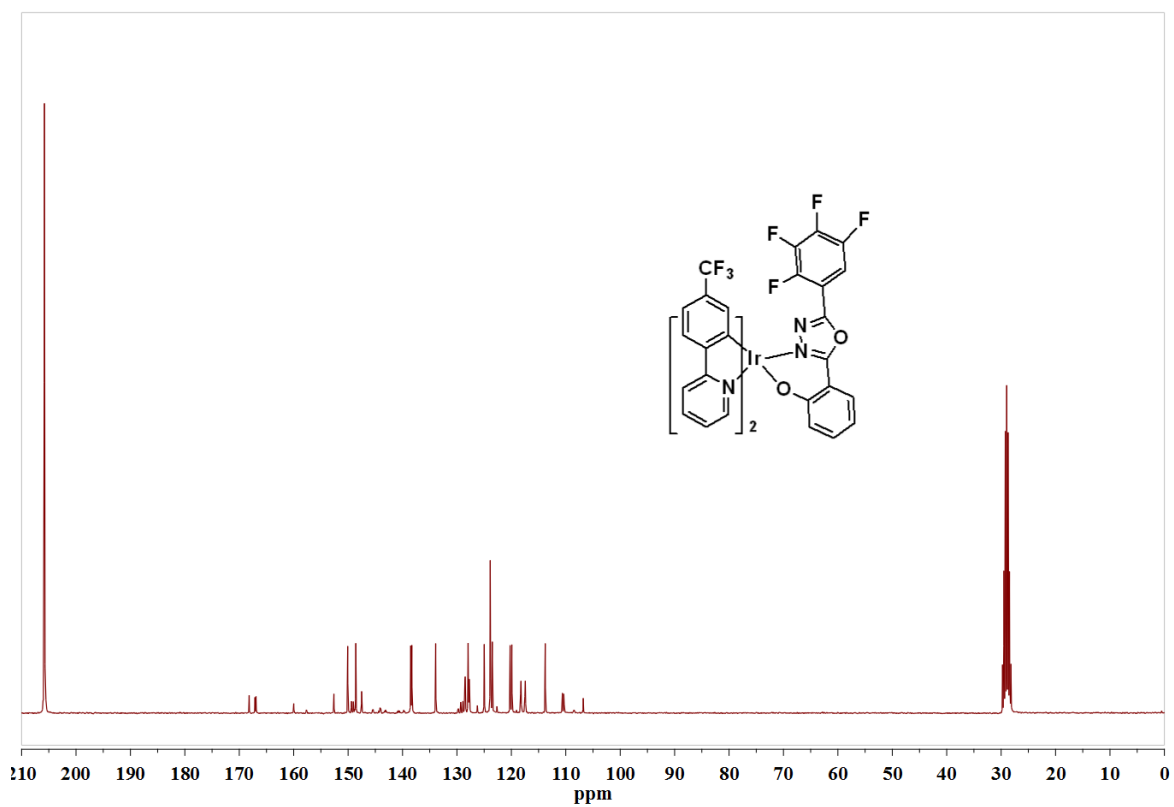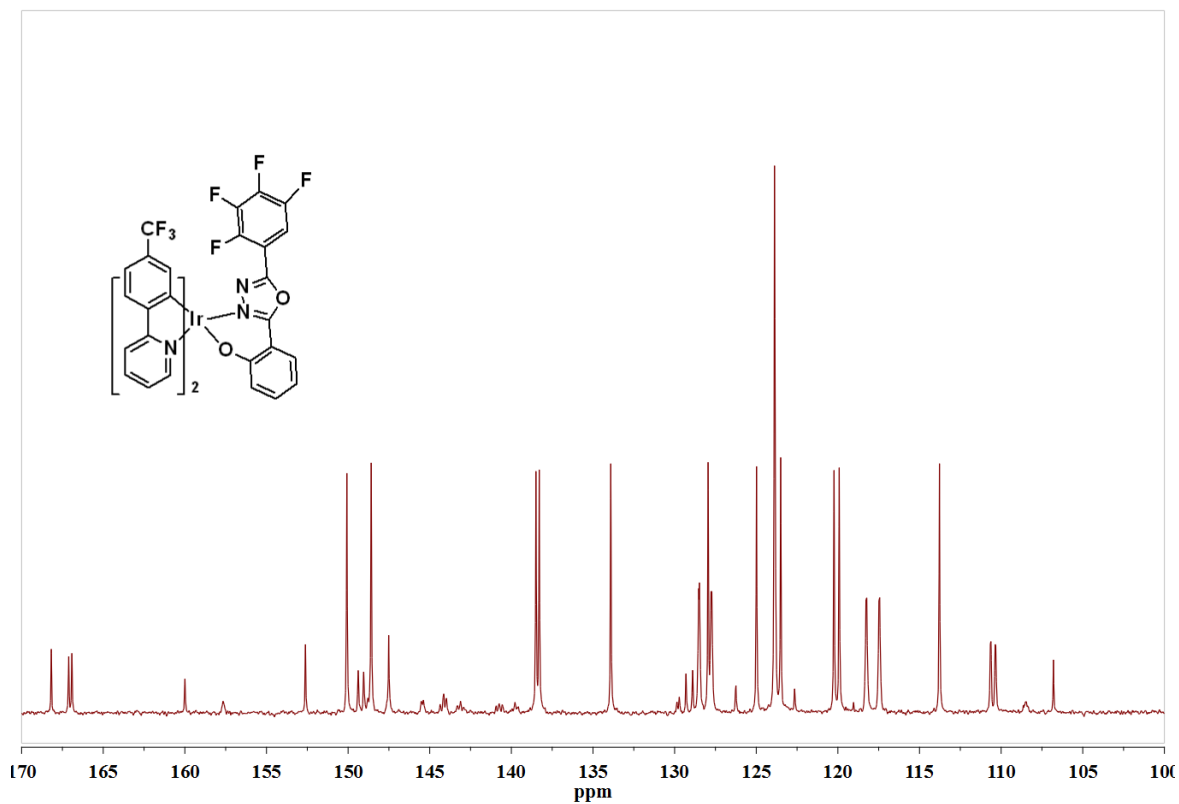

5

**Fig. S6** The  $^{13}\text{C}$ -NMR spectra of **Ir3** in acetone- $d_6$ .



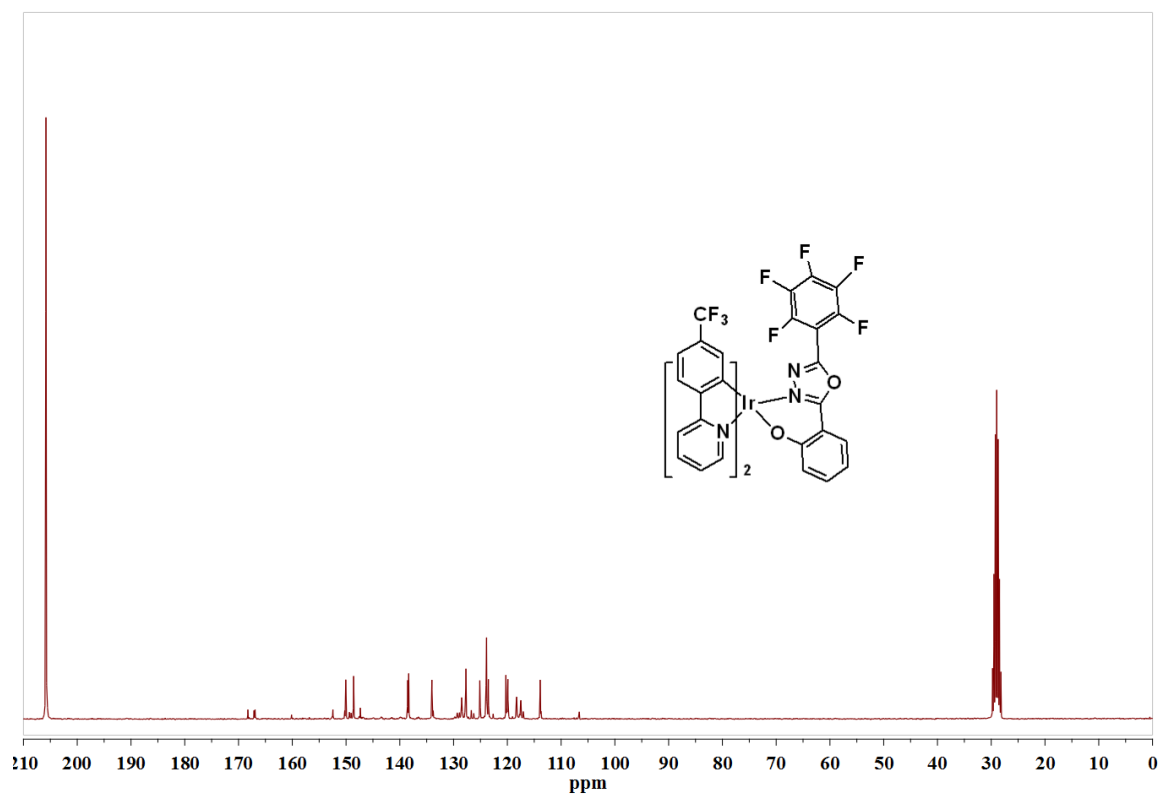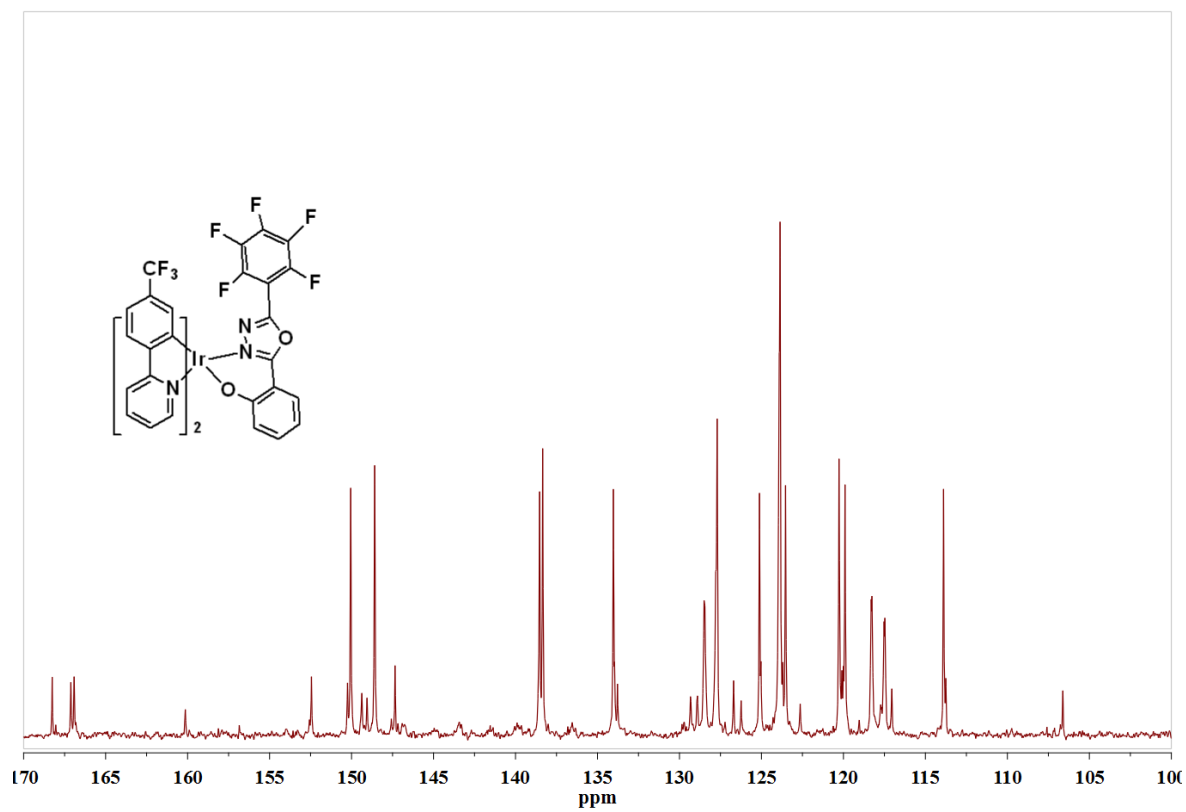

5

**Fig. S7** The  $^{13}\text{C}$ -NMR spectra of Ir4 in acetone- $d_6$ .
